# Supplementary material for: AIE-active Ir(iii) complexes functionalised with a cationic Schiff base ligand: synthesis, photophysical properties and applications in photodynamic therapy
Source: Royal Society of Chemistry journal article supplement (doi:10.1039/d2dt02960j), 2022-01-01
Supplement: d2dt02960j1.pdf [file d2dt02960j1.pdf]

## Electronic Supplementary Information (ESI)

### **AIE-active Ir(III) Complexes Functionalized with a Cationic Schiff Base Ligand: Synthesis, Photophysical Properties and Their Applications in Photodynamic Therapy**

Shengnan Liu,<sup>‡a</sup> Jiahong Han,<sup>‡a</sup> Weijin Wang,<sup>a</sup> Yulei Chang,<sup>\*b</sup> Runlin Wang,<sup>a</sup> Ziwei Wang,<sup>a</sup> Guangzhe Li,<sup>\*c</sup> Dongxia Zhu<sup>\*a</sup> and Martin R. Bryce<sup>\*d</sup>

<sup>a</sup> *Key Laboratory of Nanobiosensing and Nanobioanalysis at Universities of Jilin Province, Department of Chemistry, Northeast Normal University, 5268 Renmin Street, Changchun, Jilin Province 130024, P. R. China.*

*E-mail: [zhudx047@nenu.edu.cn](mailto:zhudx047@nenu.edu.cn)*

<sup>b</sup> *State Key Laboratory of Luminescence and Applications, Changchun Institute of Optics, Fine Mechanics and Physics, Chinese Academy of Sciences, Changchun Jilin Province 130033, China.*

*Email: [yuleichang@ciomp.ac.cn](mailto:yuleichang@ciomp.ac.cn)*

<sup>c</sup> *Jilin Provincial Science and Technology Innovation Center of Health Food of Chinese Medicine, Changchun University of Chinese Medicine, Changchun, Jilin Province 130117, P. R. China.*

*E-mail: [1993008106@qq.com](mailto:1993008106@qq.com)*

<sup>d</sup> *Department of Chemistry, Durham University, Durham, DH1 3LE, UK.*

*E-mail: [m.r.bryce@durham.ac.uk](mailto:m.r.bryce@durham.ac.uk)*

<sup>‡</sup>*The authors contributed equally to the preparation of this work.*

## Supplementary Figures and Tables

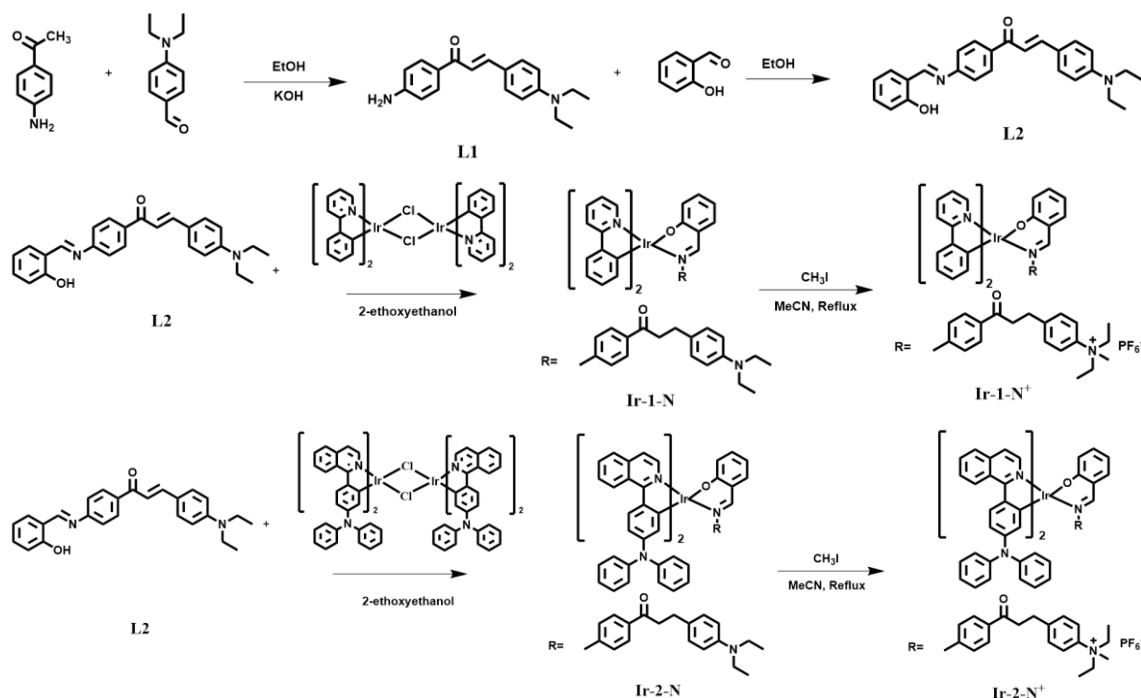

**Scheme S1** Synthetic routes of L1, L2, Ir-1-N<sup>+</sup>, and Ir-2-N<sup>+</sup>.

### Synthesis of L1

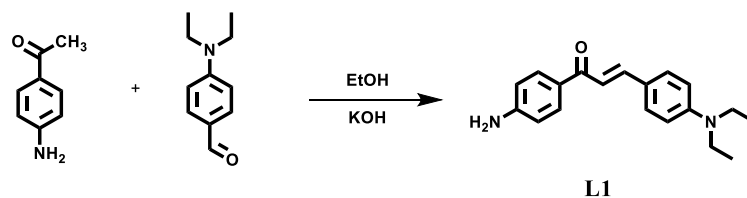

**Scheme S1.** Synthetic route for L1.

Following the literature procedure,<sup>1</sup> 4-aminoacetophenone (0.540 g, 4 mmol) and *N,N*-diethyl-4-aminobenzaldehyde (0.708 g, 4 mmol) were dissolved in ethanol (40 mL) and 10% KOH solution (20 mL) was added. The reaction was stirred at RT for 24 h. After completion of the reaction, extraction was performed with CH<sub>2</sub>Cl<sub>2</sub> to remove KOH, and the organic layer was dried over anhydrous Na<sub>2</sub>SO<sub>4</sub>. The solvent was removed by a rotary evaporator. Using ethyl acetate (EA) and petroleum ether (PE) as eluents (EA/PE from 1/10 to 1/1, v/v), the crude product was purified by silica gel column chromatography to obtain a yellow solid. Yield: 43%. <sup>1</sup>H NMR (500 MHz, CDCl<sub>3</sub>, δ [ppm]): 7.95-7.89 (m, 2H), 7.76 (d, *J* = 15.4 Hz, 1H), 7.52 (d, *J* = 8.8 Hz, 2H), 7.33 (d, *J* = 15.4 Hz, 1H), 6.72-6.63 (m, 4H), 4.10

(s, 2H), 3.41 (q,  $J = 7.1$  Hz, 4H), 1.20 (t,  $J = 7.1$  Hz, 6H).

## Synthesis of L2

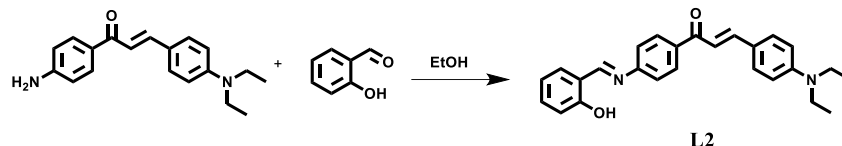

**Scheme S2.** Synthetic route for L2.

The auxiliary ligand **L2** was synthesized by a Schiff base reaction. A mixture of amino chalcone (0.088 g, 0.3 mmol) and *o*-hydroxybenzaldehyde (0.108 g, 0.9 mmol) in ethanol (30 mL) was refluxed with stirring for 8 h to give an orange precipitate. The reaction mixture was cooled to room temperature. The precipitate was filtered to obtain ligand **L2**. Yield: 90%.  $^1\text{H}$  NMR (500 MHz,  $\text{CDCl}_3$ ,  $\delta$  [ppm]): 13.03 (s, 1H), 8.67 (s, 1H), 8.13-8.07 (m, 2H), 7.82 (d,  $J = 15.3$  Hz, 1H), 7.55 (d,  $J = 8.5$  Hz, 2H), 7.46-7.40 (m, 2H), 7.38-7.32 (m, 3H), 7.05 (d,  $J = 8.3$  Hz, 1H), 6.97 (t,  $J = 7.5$  Hz, 1H), 6.67 (t,  $J = 8.5$  Hz, 2H), 3.43 (q,  $J = 7.1$  Hz, 4H), 1.21 (t,  $J = 7.1$  Hz, 6H).

## Synthesis of the Cyclometallating ligand

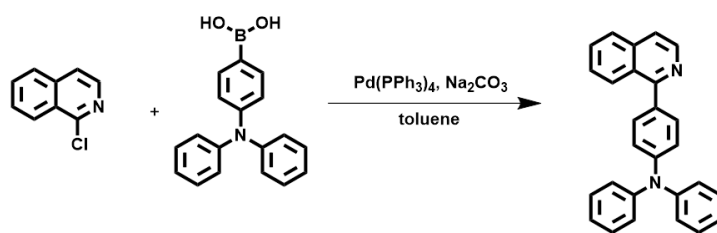

**Scheme S3.** Synthetic route for the cyclometallating ligand.

1-Chloroisoquinoline (0.496 g, 3.06 mmol) and 4-(triphenylamino)boronic acid (0.972 g, 3.36 mmol) were dissolved in toluene (30 mL) and tetrakis(triphenylphosphine)palladium(0) (0.177 g, 0.15 mmol) was added as a catalyst. Sodium carbonate (20 mL of 2 mol  $\text{L}^{-1}$  solution) was added and the mixture was refluxed for 48 h under  $\text{N}_2$ . The mixture was then left to cool and extracted with dichloromethane. The organic phase was separated, dried over anhydrous  $\text{MgSO}_4$  and evaporated. The crude product was purified by silica gel column chromatography (dichloromethane/petroleum ether, 10/3 v/v). A yellow solid was obtained in 74% yield.  $^1\text{H}$

NMR (500 MHz, CDCl<sub>3</sub>, δ [ppm]): 8.60 (d, *J* = 5.6 Hz, 1H), 8.24 (d, *J* = 8.5 Hz, 1H), 7.88 (d, *J* = 8.2 Hz, 1H), 7.70 (t, *J* = 8.1 Hz, 1H), 7.64-7.59 (m, 3H), 7.57 (t, *J* = 8.3 Hz, 1H), 7.32-7.27 (m, 4H), 7.25-7.8 (m, 6H), 7.07 (t, *J* = 8.1 Hz, 2H).

### Synthesis of dichloro-bridged diiridium complex

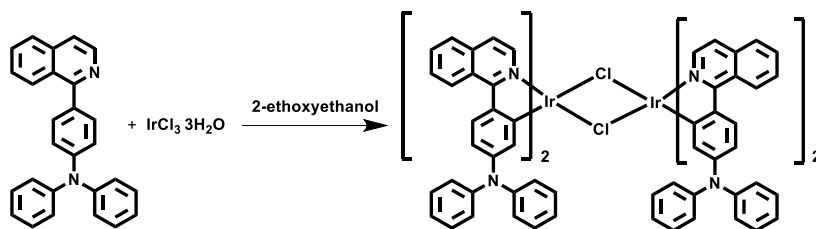

**Scheme S4.** Synthetic route for the dichloro-bridged diiridium complex.

The cyclometalating ligand (0.930 g, 2.5 mmol) and IrCl<sub>3</sub>·3H<sub>2</sub>O (0.353 g, 1 mmol) were dissolved in a mixed solution of 2-ethoxyethanol (30 mL) and water (10 mL). The solution was heated to 120 °C and refluxed for 24 h under N<sub>2</sub>. The solution was cooled to room temperature and water was added to obtain a precipitate. The mixture was stirred for 5 min and filtered to obtain a red solid which was dried in an oven for 24 h. Yield 80%. <sup>1</sup>H NMR (500 MHz, CDCl<sub>3</sub>, δ [ppm]): 8.87 (d, *J* = 6.4 Hz, 1H), 8.76 (d, *J* = 8.4 Hz, 1H), 7.89 (d, *J* = 8.8 Hz, 1H), 7.71-7.61 (m, 2H), 7.58 (d, *J* = 8.0 Hz, 1H), 6.84 (t, *J* = 8.4 Hz, 4H), 6.79-6.74 (m, 4H), 6.70-6.66 (m, 2H), 6.49 (dd, *J* = 8.8, 2.5 Hz, 1H), 6.17 (d, *J* = 6.4 Hz, 1H), 5.53 (d, *J* = 2.4 Hz, 1H).

### Synthesis of Ir-1-N

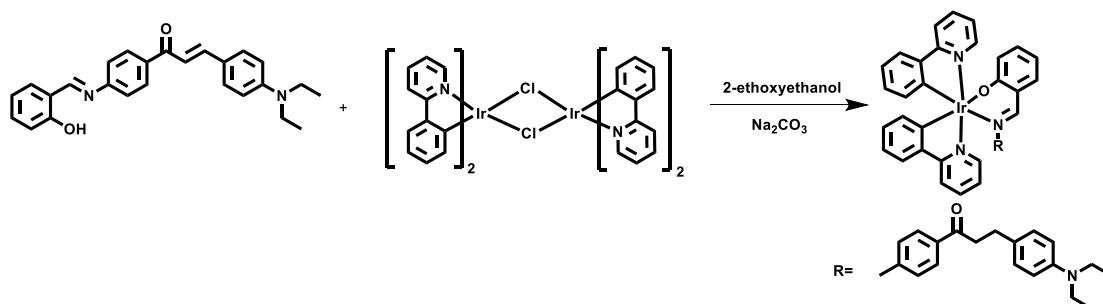

**Scheme S5.** Synthetic route for **Ir-1-N**. During the reaction the dichloro-bridged complex also acts as a catalyst to reduce the carbon-carbon double bond of the unsaturated ketone in

**L2** to a carbon-carbon single bond.<sup>2</sup>

A mixture of the dichloro-bridged diiridium complex (0.0536 g, 0.05 mmol), Schiff base ligand **L2** (0.0398 g, 0.1 mmol) and Na<sub>2</sub>CO<sub>3</sub> (0.1745 g, 1.6 mmol) in 2-ethoxyethanol (25 mL). The was heated to 140 °C under nitrogen atmosphere and refluxed for 8 h. After the reaction was completed, it was cooled to room temperature. Na<sub>2</sub>CO<sub>3</sub> was removed by adding ethyl acetate. Using CH<sub>2</sub>Cl<sub>2</sub> and petroleum ether as eluents (CH<sub>2</sub>Cl<sub>2</sub>/petroleum ether from 1/10 to 10/1, v/v), the crude product was purified by silica gel column chromatography. The complex **Ir-1-N** was obtained as an orange solid. Yield: 60%. <sup>1</sup>H NMR (500 MHz, CDCl<sub>3</sub>, δ [ppm]): 8.88 (d, *J* = 6.7 Hz, 1H), 8.83 (d, *J* = 5.7 Hz, 1H), 8.08 (s, 1H), 7.88 (d, *J* = 8.1 Hz, 1H), 7.72 (t, *J* = 7.5 Hz, 1H), 7.69-7.64 (m, 1H), 7.58 (d, *J* = 7.7 Hz, 1H), 7.49 (d, *J* = 8.1 Hz, 1H), 7.33 (d, *J* = 3.7 Hz, 1H), 7.31 (d, *J* = 3.7 Hz, 1H), 7.25 (d, *J* = 2.0 Hz, 1H), 7.13 (dd, *J* = 8.0, 6.1 Hz, 2H), 7.09-7.02 (m, 3H), 6.96 (dd, *J* = 5.9, 3.0 Hz, 1H), 6.85 (t, *J* = 7.6 Hz, 1H), 6.74-6.67 (m, 3H), 6.65 (d, *J* = 8.6 Hz, 1H), 6.46-6.51 (m, 2H), 6.40 (t, *J* = 7.4 Hz, 1H), 6.25 (t, *J* = 7.6 Hz, 1H), 6.18 (t, *J* = 8.3 Hz, 2H), 6.16-6.14 (m, 1H), 3.34 (q, *J* = 7.1 Hz, 3H), 3.15 (q, *J* = 7.2 Hz, 1H), 3.03 (q, *J* = 7.1 Hz, 2H), 2.88-2.83 (m, 2H), 1.25 (t, *J* = 7.1 Hz, 2H), 1.15 (t, *J* = 7.0 Hz, 4H). <sup>13</sup>C{<sup>1</sup>H} NMR (151 MHz, CDCl<sub>3</sub>) δ 197.89, 167.71, 167.36, 166.03, 160.07, 154.17, 148.82, 148.06, 147.29, 143.47, 143.03, 135.82, 135.76, 134.32, 133.57, 132.18, 132.15, 131.53, 128.35, 128.11, 128.04, 126.66, 123.90, 122.81, 122.49, 121.52, 120.67, 120.36, 120.34, 118.90, 117.98, 116.97, 112.70, 111.16, 43.39, 39.96, 28.42, 11.58. ESI-MS: [m/z] = 901.31 (M<sup>+</sup> + H) [calcd for C<sub>48</sub>H<sub>43</sub>IrN<sub>4</sub>O<sub>2</sub> (M<sup>+</sup>) 900.10]. The higher mass peak at 923 in Fig. S7 is from M<sup>+</sup> + Na. Anal. Calcd. for C<sub>48</sub>H<sub>43</sub>IrN<sub>4</sub>O<sub>2</sub>: C 64.05, H 4.82, N 6.22. Found C 64.02, H 4.80, N 6.24.

## Synthesis of Ir-2-N

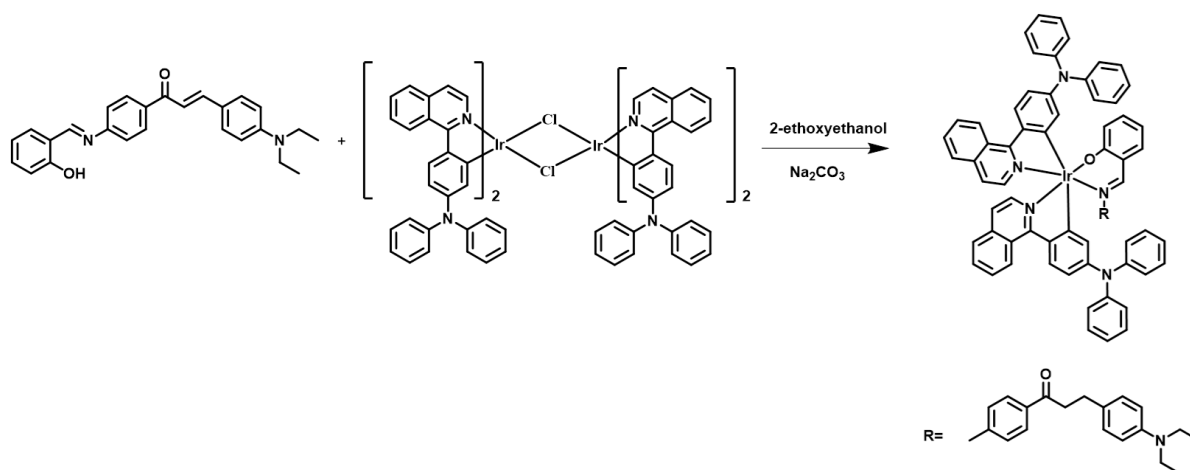

**Scheme S6.** Synthetic route for **Ir-2-N**. As in the synthesis of **Ir-1-N**, the dichloro-bridged complex also acts as a catalyst to reduce the carbon-carbon double bond in the unsaturated ketone of **L2** to a carbon-carbon single bond.<sup>2</sup>

A mixture of the dichloro-bridged diiridium complex (0.0970 g, 0.05 mmol), Schiff base ligand **L2** (0.0398 g, 0.1 mmol) and  $\text{Na}_2\text{CO}_3$  (0.1745 g, 1.6 mmol) in 2-ethoxyethanol (25 mL) was heated to 140 °C under nitrogen and refluxed for 8 h. After the reaction was completed, it was cooled to room temperature.  $\text{Na}_2\text{CO}_3$  was removed by adding ethyl acetate. The obtained crude product was purified by column chromatography with ethyl acetate and petroleum ether as eluents (ethyl acetate /petroleum ether from 1/10 to 10/1, v/v), and a red solid of complex **Ir-2-N** was obtained. Yield: 60%.  $^1\text{H}$  NMR (500 MHz,  $\text{CDCl}_3$ ,  $\delta$  [ppm]): 8.72 (d,  $J = 8.4$  Hz, 1H), 8.56 (d,  $J = 6.3$  Hz, 1H), 8.45 (d,  $J = 6.4$  Hz, 1H), 8.34 (d,  $J = 8.6$  Hz, 1H), 8.04 (s, 1H), 7.95 (d,  $J = 8.9$  Hz, 1H), 7.73 (d,  $J = 8.1$  Hz, 1H), 7.69 (d,  $J = 7.9$  Hz, 1H), 7.64-7.52 (m, 4H), 7.49 (d,  $J = 8.8$  Hz, 1H), 7.39 (d,  $J = 8.2$  Hz, 2H), 7.24-7.20 (m, 1H), 7.10 (t,  $J = 7.8$  Hz, 2H), 7.03 (t,  $J = 8.0$  Hz, 3H), 6.98-6.93 (m, 4H), 6.89 (dd,  $J = 8.5, 7.1$  Hz, 4H), 6.85-6.81 (m, 4H), 6.79-6.75 (m, 4H), 6.75-6.71 (m, 3H), 6.66 (dd,  $J = 8.1, 6.7$  Hz, 2H), 6.61 (d,  $J = 8.7$  Hz, 2H), 6.58 (dd,  $J = 8.8, 2.5$  Hz, 1H), 6.39-6.35 (m, 1H), 6.32 (dd,  $J = 8.8, 2.5$  Hz, 1H), 6.22 (d,  $J = 8.0$  Hz, 2H), 5.88 (d,  $J = 2.5$  Hz, 1H), 5.66 (d,  $J = 2.4$  Hz, 1H), 3.32 (q,  $J = 7.0$  Hz, 4H), 3.08-3.01 (m, 2H), 2.88 (t,  $J = 7.8$  Hz, 2H), 1.14 (t,  $J = 7.0$  Hz, 6H).  $^{13}\text{C}\{^1\text{H}\}$  NMR (151 MHz,  $\text{CDCl}_3$ )  $\delta$  197.59, 167.45, 166.72, 165.83, 159.82, 154.83, 146.44, 145.75, 145.70, 140.18, 139.21, 137.91, 135.74, 135.59, 134.34, 133.43, 132.28, 129.33, 129.02, 128.73, 128.31, 128.15, 127.66, 127.54, 126.82, 126.61, 125.97, 125.21, 124.97, 124.61, 124.43, 124.29, 123.94, 123.73, 122.19, 121.98, 121.88, 120.37, 117.30, 117.25, 112.57, 112.37,

112.24, 111.19, 43.38, 40.01, 28.67, 28.39, 11.59. ESI-MS:  $[m/z] = 1335.4860 (M^+ + H)$  [calcd for  $C_{80}H_{65}IrN_6O_2 (M^+)$  1334.63]. Anal. Calcd. for  $C_{80}H_{65}IrN_6O_2$ : C 71.99, H 4.91, N 6.30. Found C 72.02, H 4.88, N 6.32.

### Synthesis of Ir-1-N<sup>+</sup>

The complex **Ir-1-N** (0.0450 g, 0.05 mmol) and acetonitrile were mixed under nitrogen atmosphere. Iodomethane (1 mL) was added dropwise and the mixture was heated for 12 h. After the reaction was completed, it was cooled to room temperature. The mixture was poured into diethyl ether to obtain a yellow precipitate. The precipitate was filtered and dissolved in acetone (10 mL). Saturated  $KPF_6$  (5 mL) was added to the solution with stirring for 2 h.  $KPF_6$  was filtered and the filtrate solution was evaporated to obtain **Ir-1-N<sup>+</sup>** as a yellow solid. Yield: 90%.  $^1H$  NMR (500 MHz,  $CDCl_3$ ,  $\delta$  [ppm]): 8.86 (d,  $J = 5.6$  Hz, 1H), 8.81 (d,  $J = 5.7$  Hz, 1H), 8.07 (s, 1H), 7.86 (d,  $J = 8.1$  Hz, 1H), 7.71 (d,  $J = 8.4$  Hz, 1H), 7.68 (d,  $J = 8.6$  Hz, 1H), 7.56 (d,  $J = 7.7$  Hz, 1H), 7.53 (d,  $J = 8.3$  Hz, 1H), 7.43 (d,  $J = 8.6$  Hz, 2H), 7.38 (d,  $J = 8.6$  Hz, 2H), 7.32 (d,  $J = 8.3$  Hz, 2H), 7.23 (d,  $J = 7.5$  Hz, 1H), 7.11 (d,  $J = 8.1$  Hz, 2H), 7.05 (t,  $J = 6.5$  Hz, 1H), 6.99-6.94 (m, 1H), 6.82 (t,  $J = 7.4$  Hz, 1H), 6.67 (dd,  $J = 8.6, 8.0$  Hz, 2H), 6.48-6.44 (m, 2H), 6.39 (t,  $J = 7.3$  Hz, 1H), 6.22 (d,  $J = 7.9$  Hz, 2H), 6.19 (d,  $J = 8.4$  Hz, 1H), 6.13 (d,  $J = 7.3$  Hz, 1H), 5.34 (t,  $J = 4.8$  Hz, 1H), 3.85 (q,  $J = 7.0$  Hz, 2H), 3.70 (q,  $J = 6.9$  Hz, 2H), 3.29 (s, 3H), 3.10 (d,  $J = 6.9$  Hz, 2H), 3.03 (d,  $J = 7.2$  Hz, 2H), 2.21 (t,  $J = 7.5$  Hz, 1H), 2.02 (t,  $J = 7.0$  Hz, 4H).  $^{13}C\{^1H\}$  NMR (151 MHz,  $DMSO-d_6$ )  $\delta$  196.37, 168.13, 155.87, 154.12, 145.36, 144.80, 144.36, 139.39, 130.84, 130.57, 130.46, 127.89, 124.85, 123.03, 122.32, 122.26, 121.76, 121.50, 121.44, 113.50, 113.00, 63.60, 53.71, 46.25, 38.31, 29.61, 8.68. ESI-MS:  $[m/z] = 915.3269 (M^+)$  (calcd: 915.32). Anal. Calcd. for  $C_{49}H_{46}IrN_4O_2^+$ : C 64.31, H 5.07, N 6.12. Found C 64.32, H 5.05, N 6.14.

### Synthesis of Ir-2-N<sup>+</sup>

Following the procedure to obtain **Ir-1-N<sup>+</sup>**, the complex **Ir-2-N** (0.0450 g, 0.05 mmol) and acetonitrile were mixed under nitrogen atmosphere. Iodomethane (1 mL) was added dropwise

and the mixture was heated for 12 h. After the reaction was completed, it was cooled to room temperature. The mixture was poured into diethyl ether to obtain a precipitate. The precipitate was filtered and dissolved in acetone (10 mL). Saturated  $\text{KPF}_6$  (5 mL) was added into the solution with stirring for 2 h.  $\text{KPF}_6$  was filtered and the filtrate solution was evaporated to obtain **Ir-2-N<sup>+</sup>** as a red solid in 89% yield.  $^1\text{H}$  NMR (500 MHz,  $\text{CDCl}_3$ ,  $\delta$  [ppm]): 8.69 (d,  $J = 8.4$  Hz, 1H), 8.55 (d,  $J = 6.3$  Hz, 1H), 8.42 (d,  $J = 6.4$  Hz, 1H), 8.55 (d,  $J = 6.3$  Hz, 1H), 8.37 (d,  $J = 8.7$  Hz, 1H), 8.02 (s, 1H), 7.92 (d,  $J = 8.8$  Hz, 1H), 7.72 (d,  $J = 8.2$  Hz, 1H), 7.68 (d,  $J = 7.9$  Hz, 1H), 7.64 (d,  $J = 7.2$  Hz, 1H), 7.61 (d,  $J = 9.0$  Hz, 1H), 7.58 (d,  $J = 4.8$  Hz, 1H), 7.55 (d,  $J = 8.0$  Hz, 1H), 7.49 (d,  $J = 8.9$  Hz, 1H), 7.42 (d,  $J = 8.8$  Hz, 2H), 7.40-7.34 (m, 4H), 7.22 (t,  $J = 8.1$  Hz, 1H), 7.08 (t,  $J = 6.5$  Hz, 2H), 7.01 (d,  $J = 6.4$  Hz, 1H), 6.95 (t,  $J = 7.7$  Hz, 3H), 6.88 (t,  $J = 7.7$  Hz, 3H), 6.82 (d,  $J = 7.9$  Hz, 4H), 6.77-6.73 (m, 6H), 6.69 (d,  $J = 6.8$  Hz, 1H), 6.66 (d,  $J = 7.3$  Hz, 2H), 6.56 (d,  $J = 8.8$  Hz, 1H), 6.36 (t,  $J = 7.4$  Hz, 1H), 6.30 (d,  $J = 8.8$  Hz, 1H), 6.30 (d,  $J = 8.0$  Hz, 2H), 5.84 (d,  $J = 2.4$  Hz, 1H), 5.61 (d,  $J = 2.4$  Hz, 1H), 5.35 (t,  $J = 4.9$  Hz, 1H), 3.92 (q,  $J = 6.3$  Hz, 2H), 3.88 (q,  $J = 6.9$  Hz, 2H), 3.38 (s, 3H), 3.11 (q,  $J = 6.1$  Hz, 2H), 3.06 (d,  $J = 6.6$  Hz, 2H), 2.02 (t,  $J = 6.7$  Hz, 6H).  $^{13}\text{C}\{^1\text{H}\}$  NMR (151 MHz,  $\text{DMSO-}d_6$ )  $\delta$  196.32, 154.15, 147.17, 146.39, 146.27, 144.39, 143.82, 139.40, 136.90, 130.83, 130.58, 129.39, 127.94, 125.84, 125.22, 124.85, 124.08, 123.78, 122.30, 122.26, 112.99, 63.59, 46.22, 38.30, 29.61, 26.82, 8.69. ESI-MS:  $[m/z] = 1349.5000$  ( $\text{M}^+$ ) (calcd: 1349.50). Anal. Calcd. for  $\text{C}_{81}\text{H}_{67}\text{IrN}_6\text{O}_2^+$ : C 72.14, H 5.01, N 6.23. Found C 72.15, H 5.03, N 6.24.



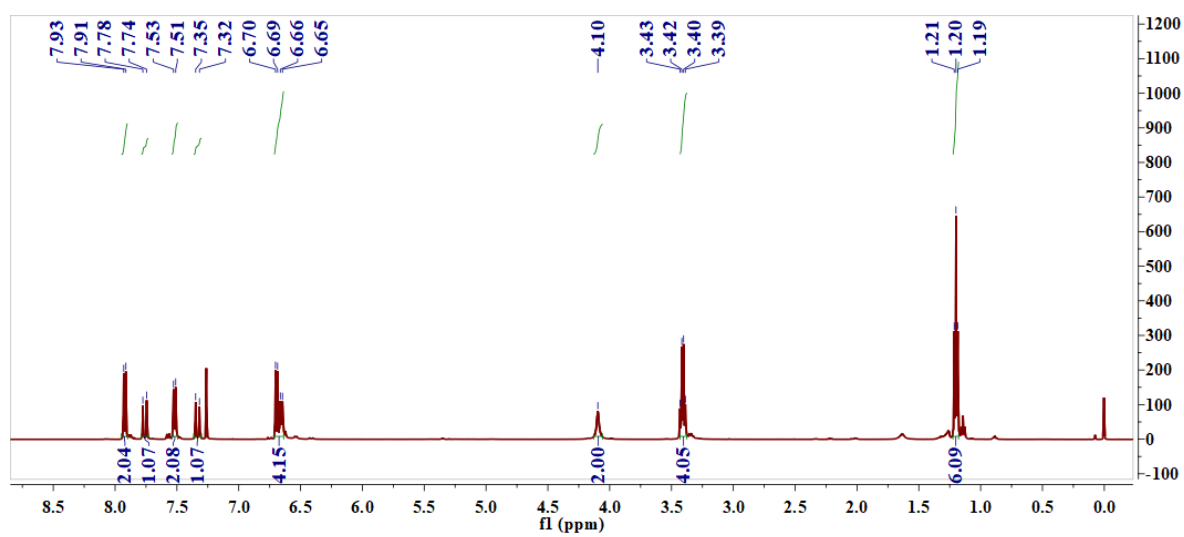

**Fig. S1.**  $^1\text{H}$  NMR spectrum of **L1** in  $\text{CDCl}_3$  at room temperature.

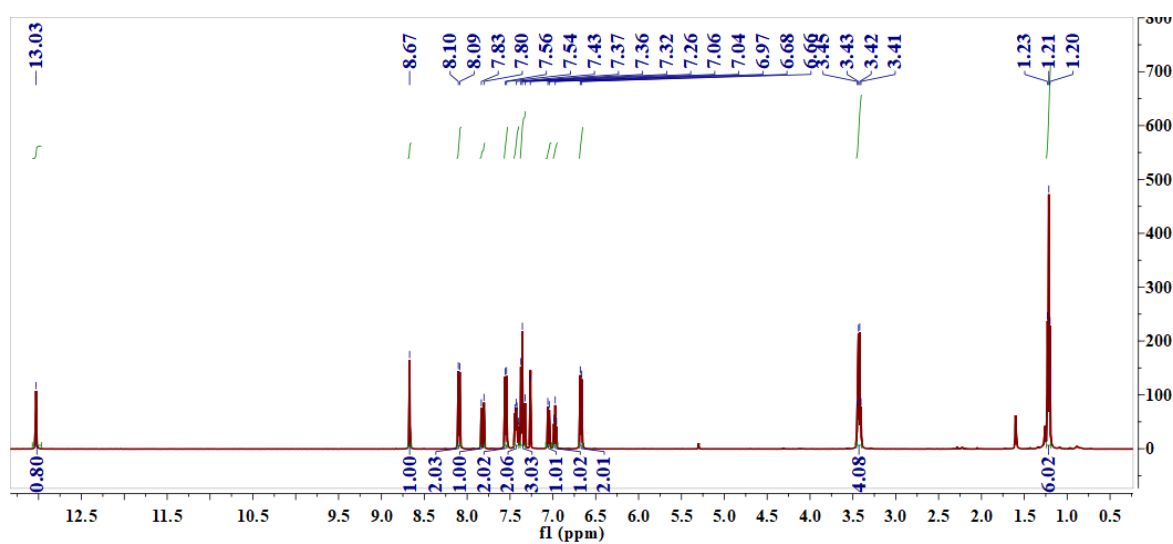

**Fig. S2.**  $^1\text{H}$  NMR spectrum of **L2** in  $\text{CDCl}_3$  at room temperature.

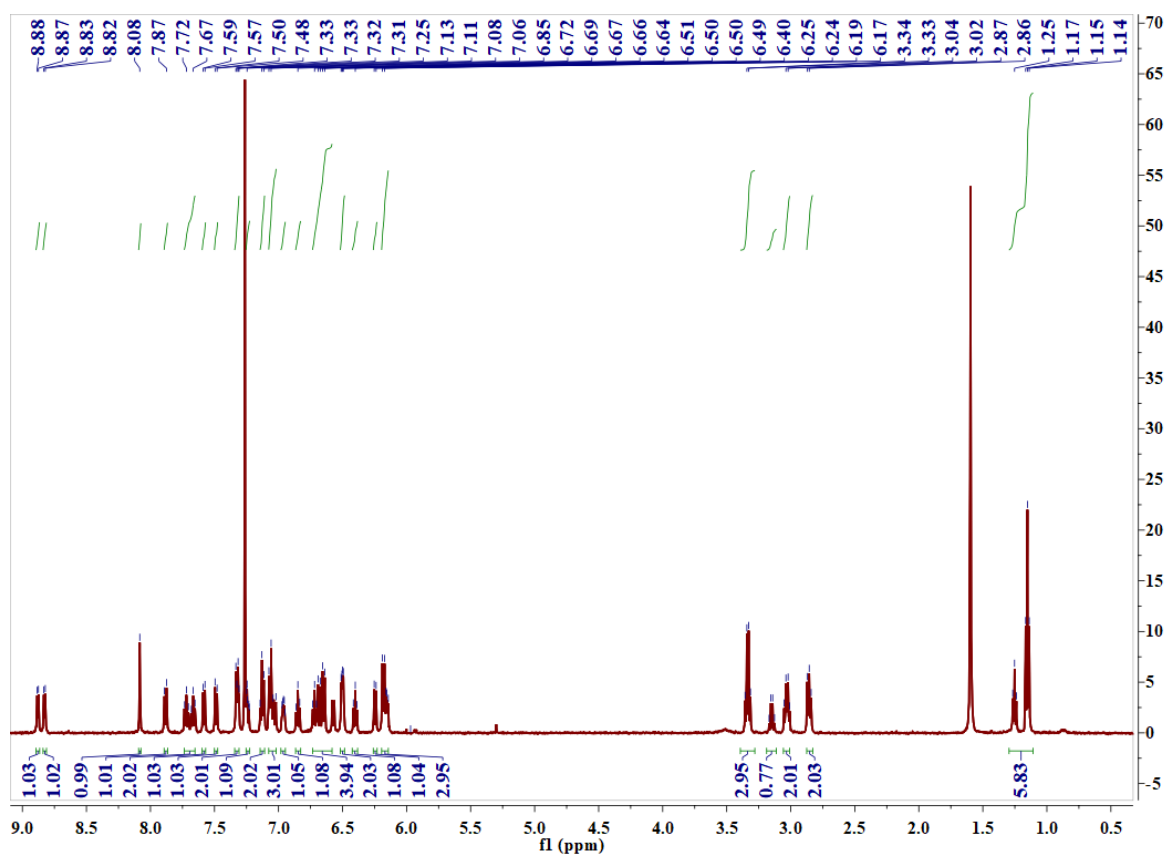

Fig. S3  $^1\text{H}$  NMR spectrum of Ir-1-N in  $\text{CDCl}_3$

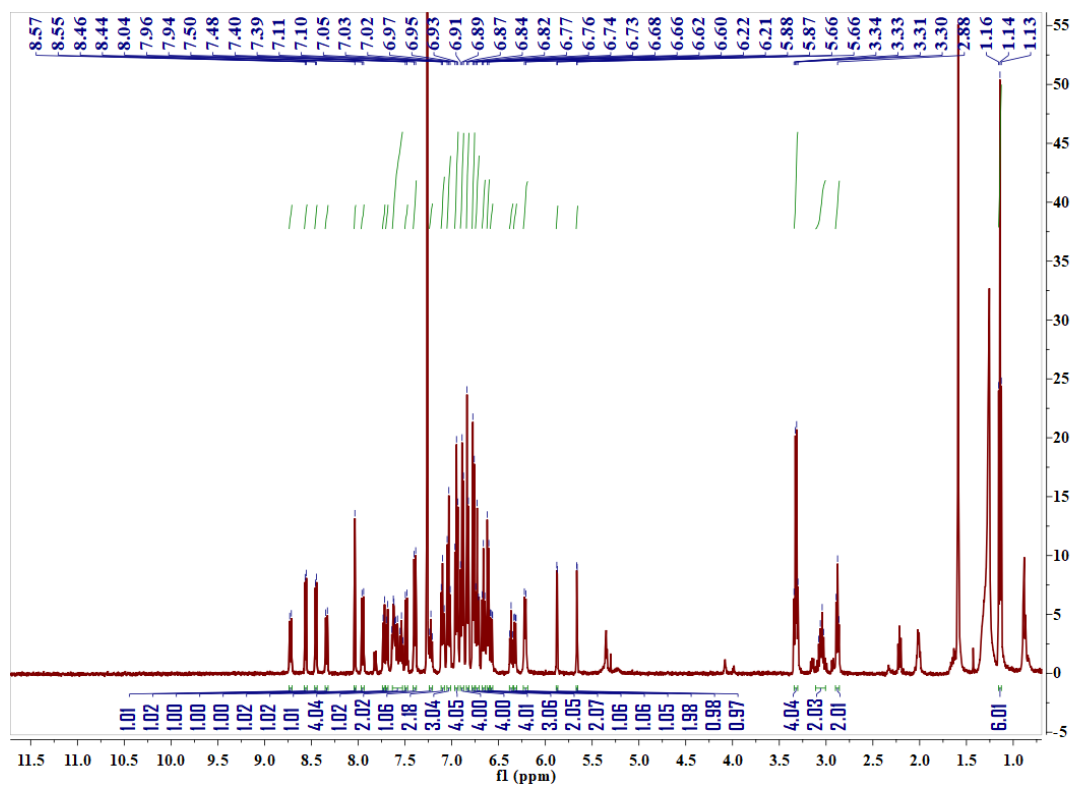

Fig. S4  $^1\text{H}$  NMR spectrum of Ir-2-N in  $\text{CDCl}_3$

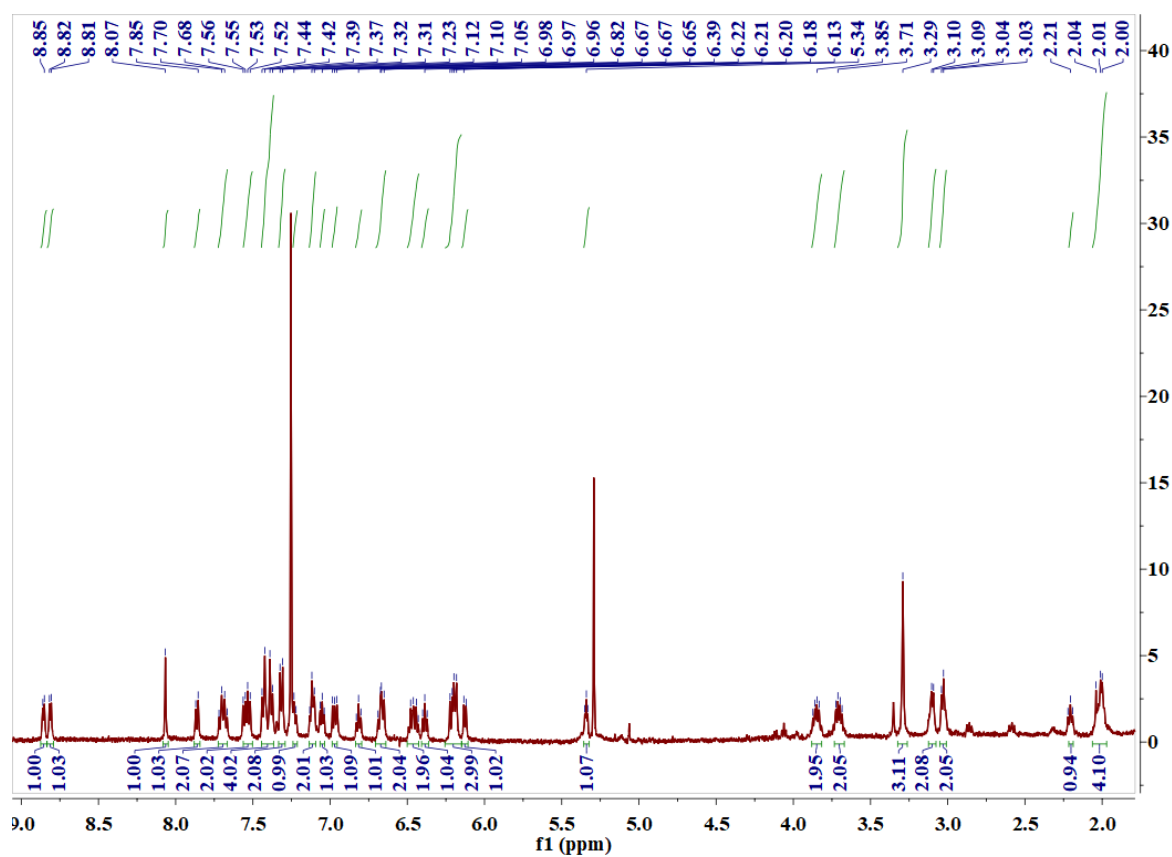

Fig. S5  $^1\text{H}$  NMR spectrum of **Ir-1-N<sup>+</sup>** in  $\text{CDCl}_3$ .

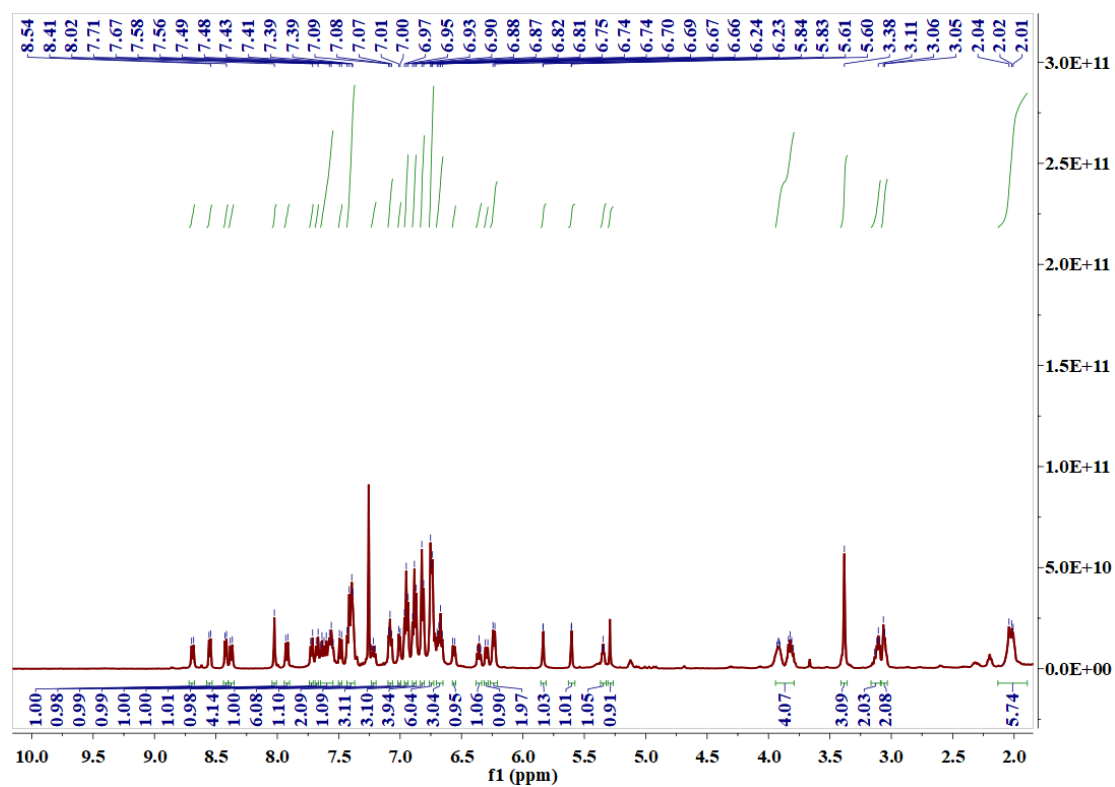

Fig. S6  $^1\text{H}$  NMR spectrum of **Ir-2-N<sup>+</sup>** in  $\text{CDCl}_3$ .

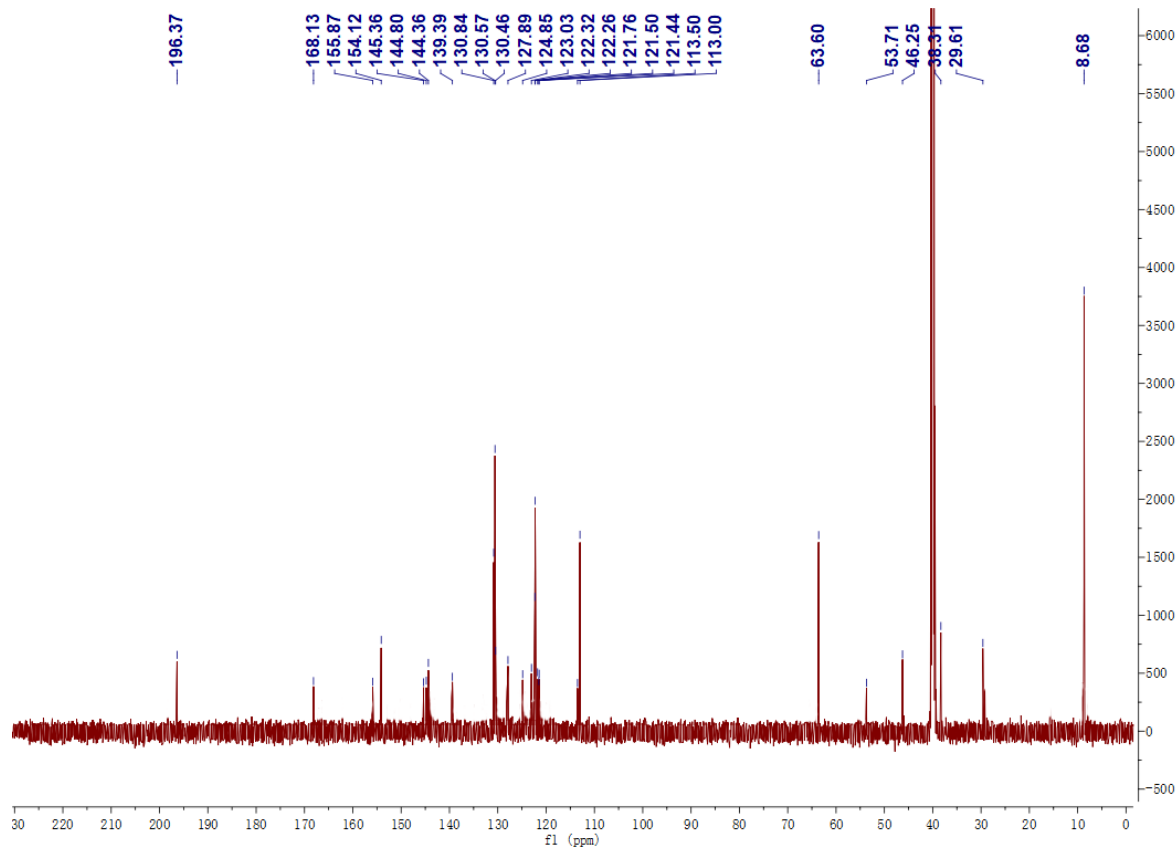

**Fig. S7**  $^{13}\text{C}\{^1\text{H}\}$  NMR spectrum of **Ir-1-N<sup>+</sup>** in  $\text{CDCl}_3$

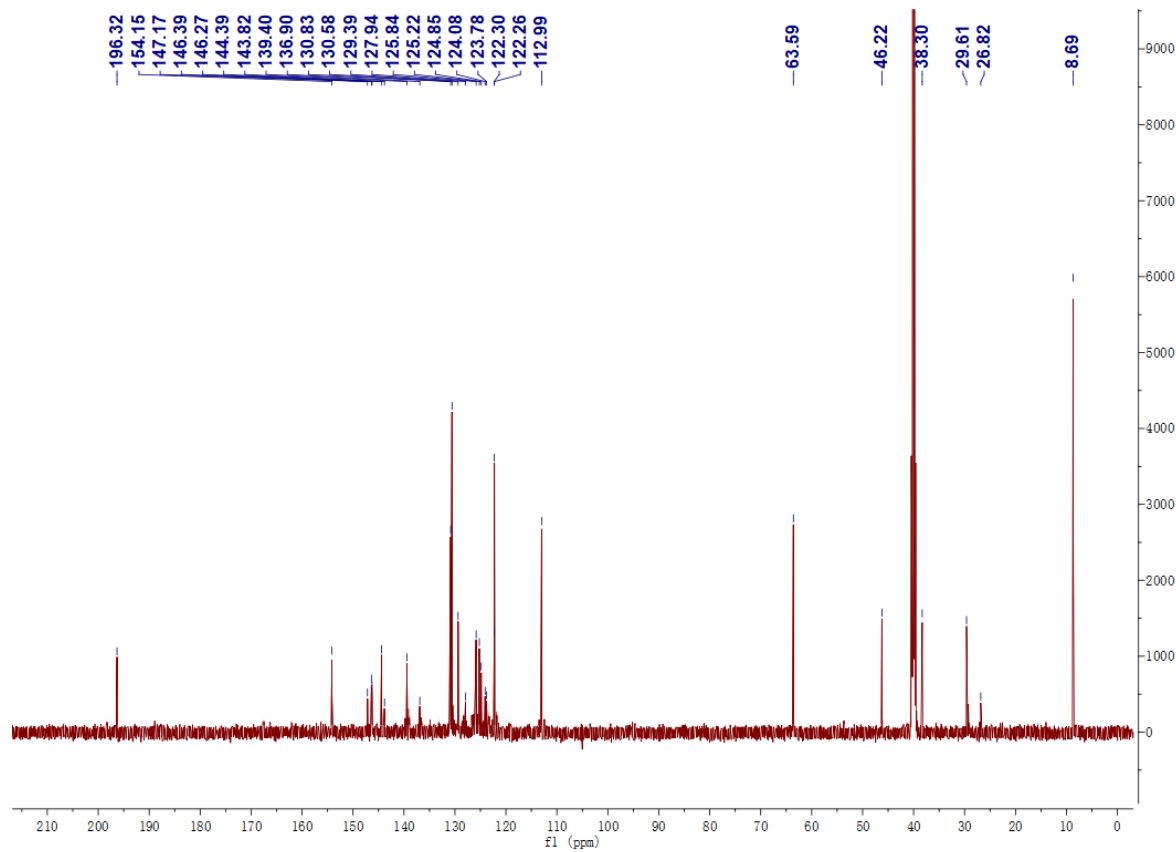

**Fig. S8**  $^{13}\text{C}\{^1\text{H}\}$  NMR spectrum of **Ir-1-N<sup>+</sup>** in  $\text{CDCl}_3$

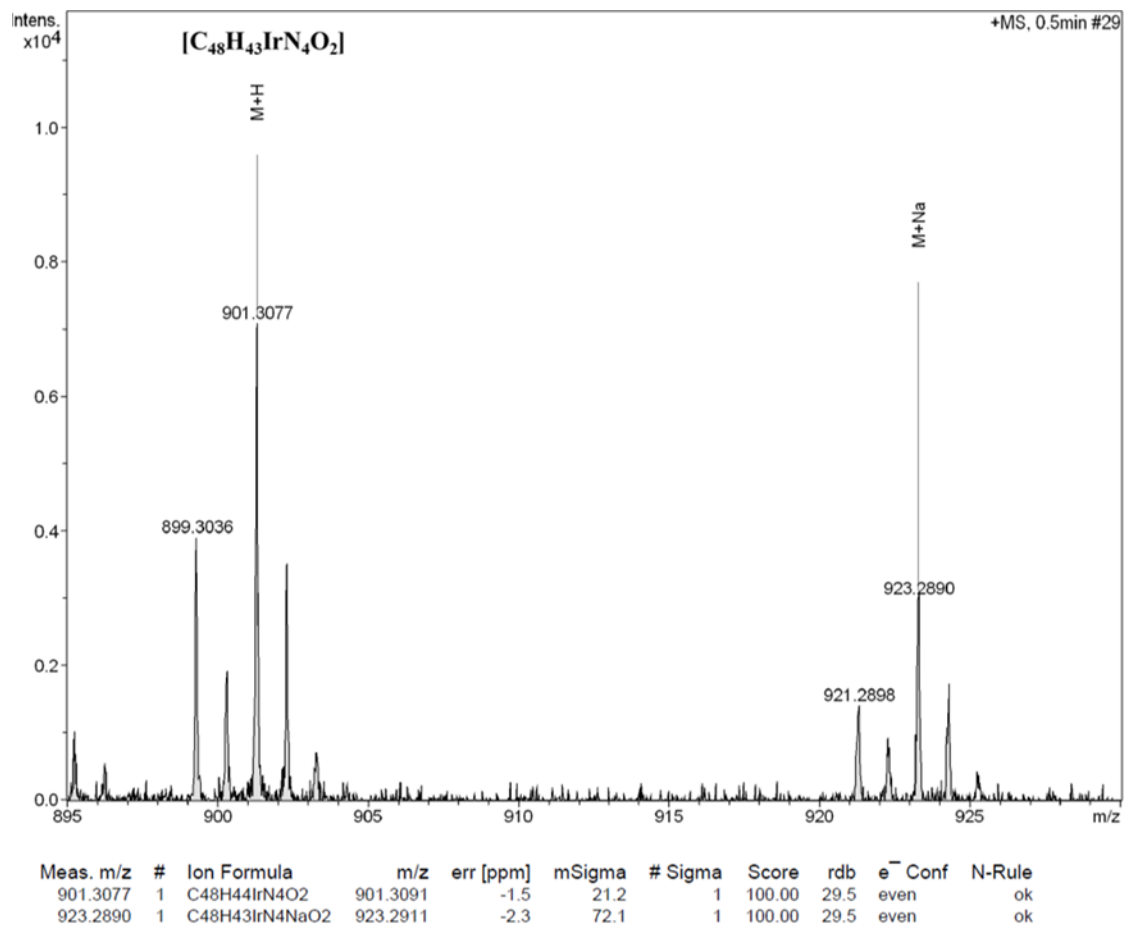

**Fig. S9** High Resolution Mass Spectrometry (HRMS) of **Ir-1-N**

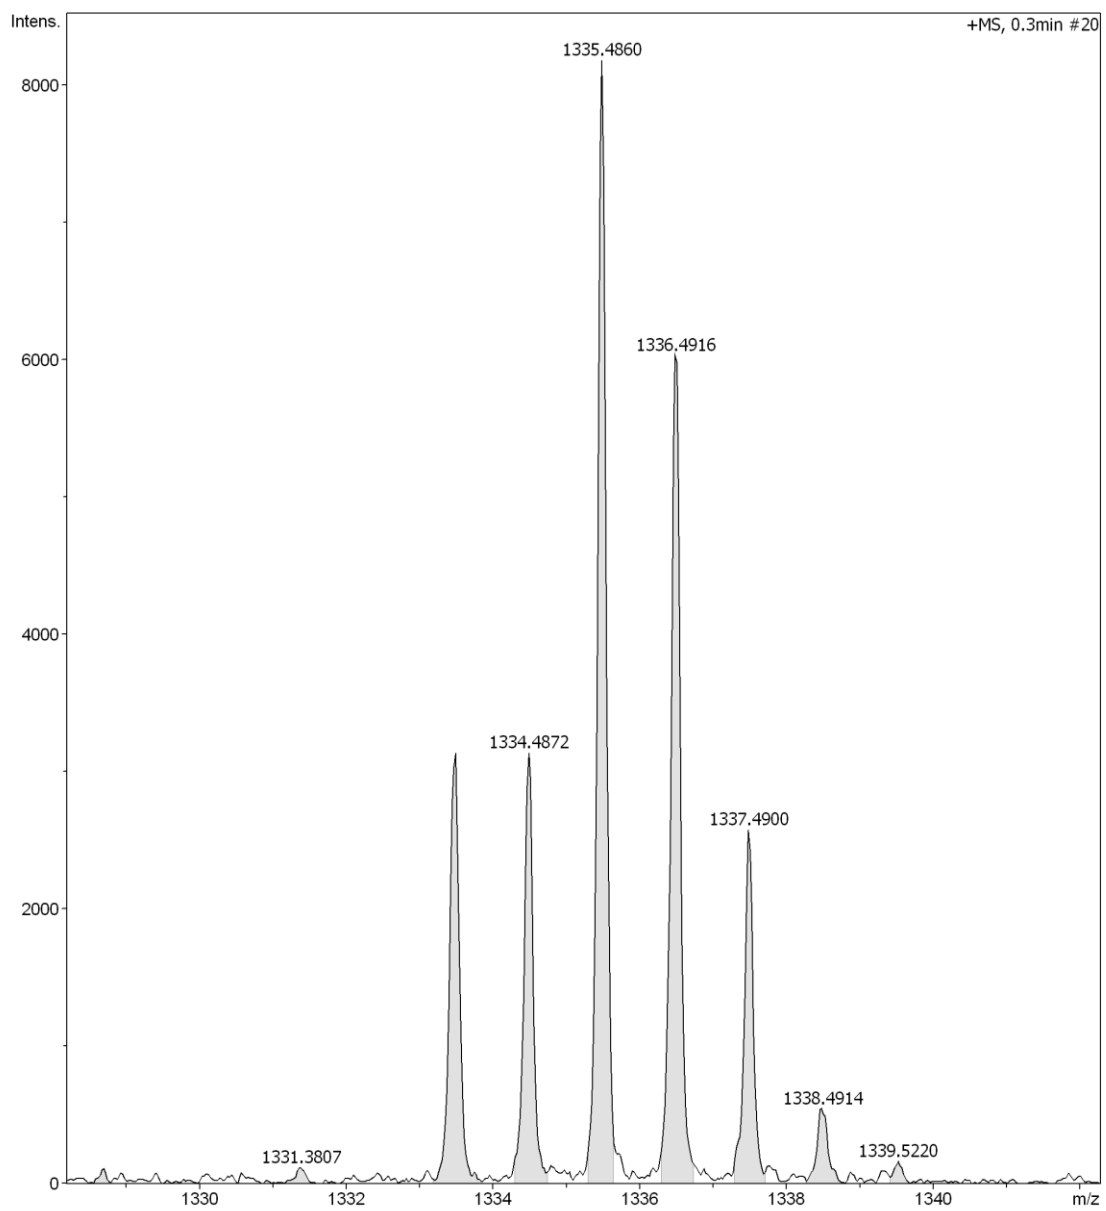

**Fig. S10** High Resolution Mass Spectrometry (HRMS) of **Ir-2-N**

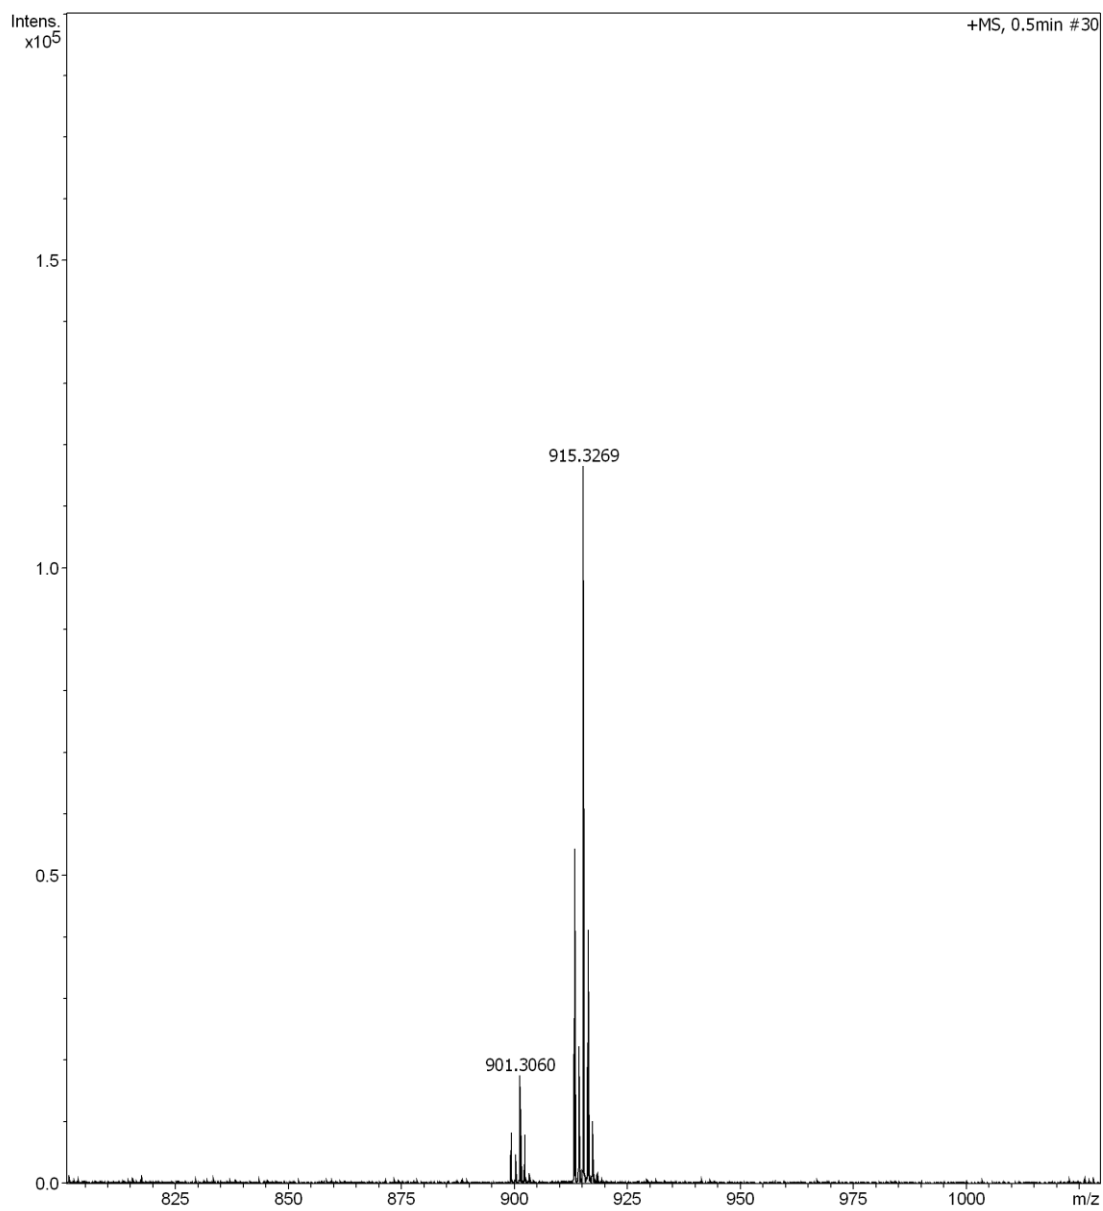

**Fig. S11** High Resolution Mass Spectrometry (HRMS) of **Ir-1-N<sup>+</sup>**

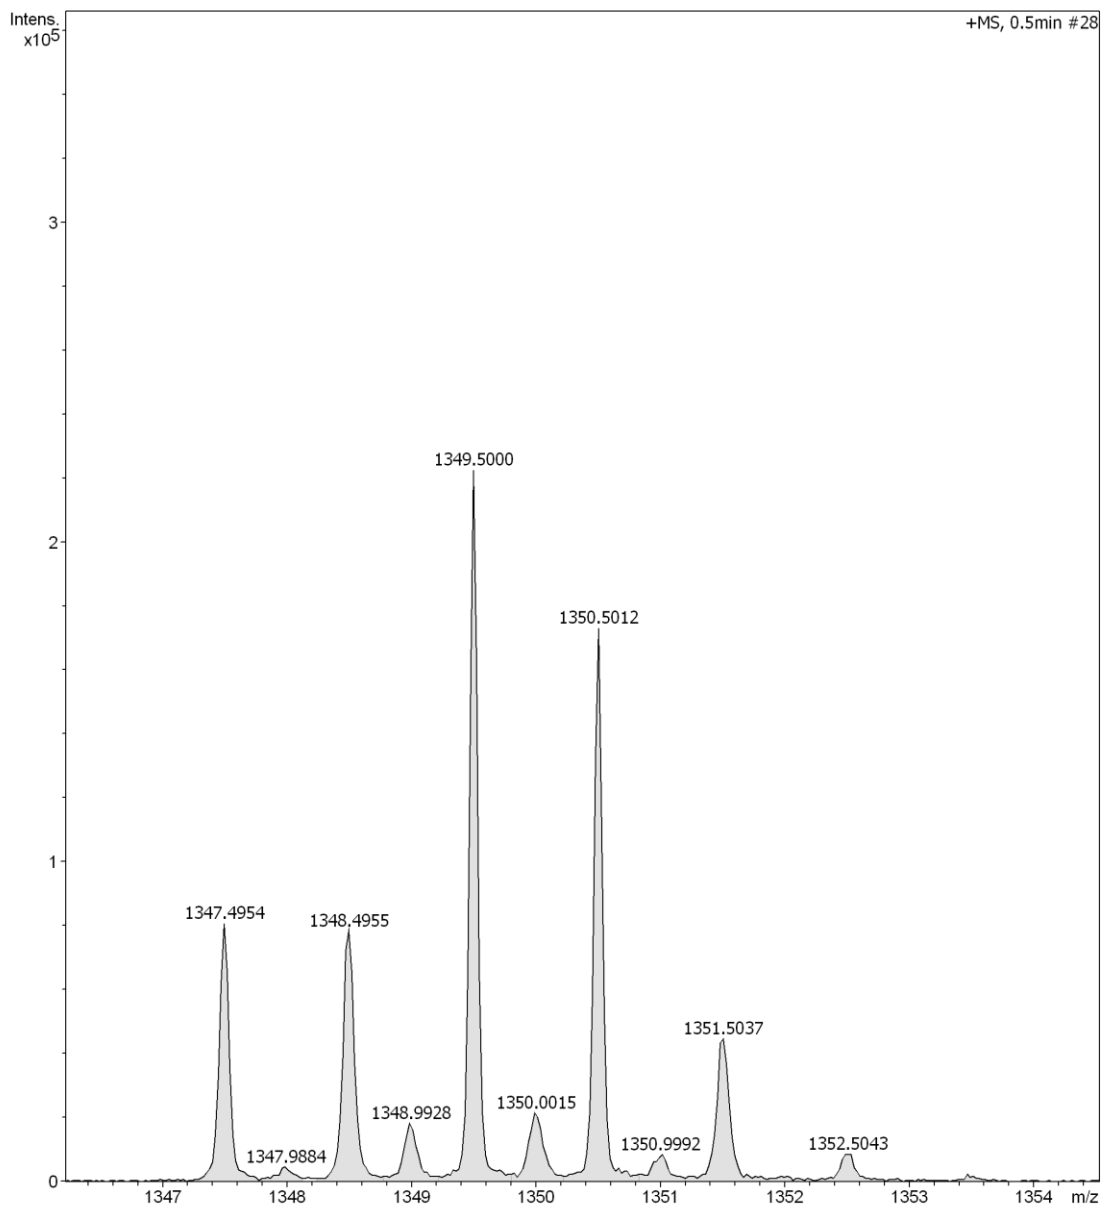

**Fig. S12** High Resolution Mass Spectrometry (HRMS) of **Ir-2-N<sup>+</sup>**

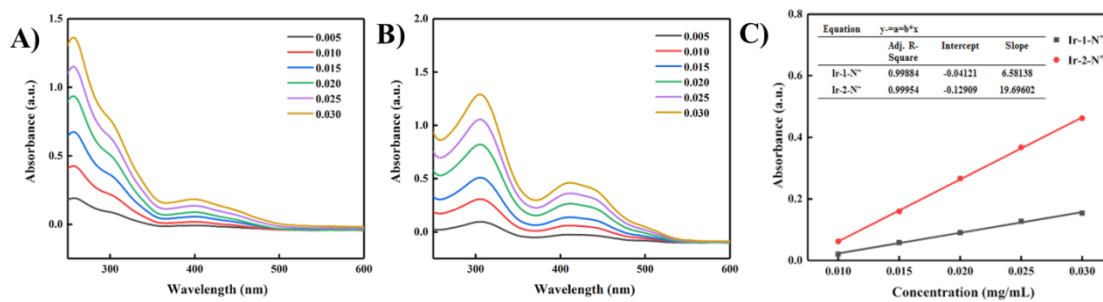

**Fig. S13** UV-vis absorption spectra of A) **Ir-1-N<sup>+</sup>** and B) **Ir-2-N<sup>+</sup>** at different concentrations in CH<sub>3</sub>CN-water (v/v) =4/1. C) Standard plots of **Ir-1-N<sup>+</sup>** and **Ir-2-N<sup>+</sup>** in CH<sub>3</sub>CN-water (v/v) =4/1.



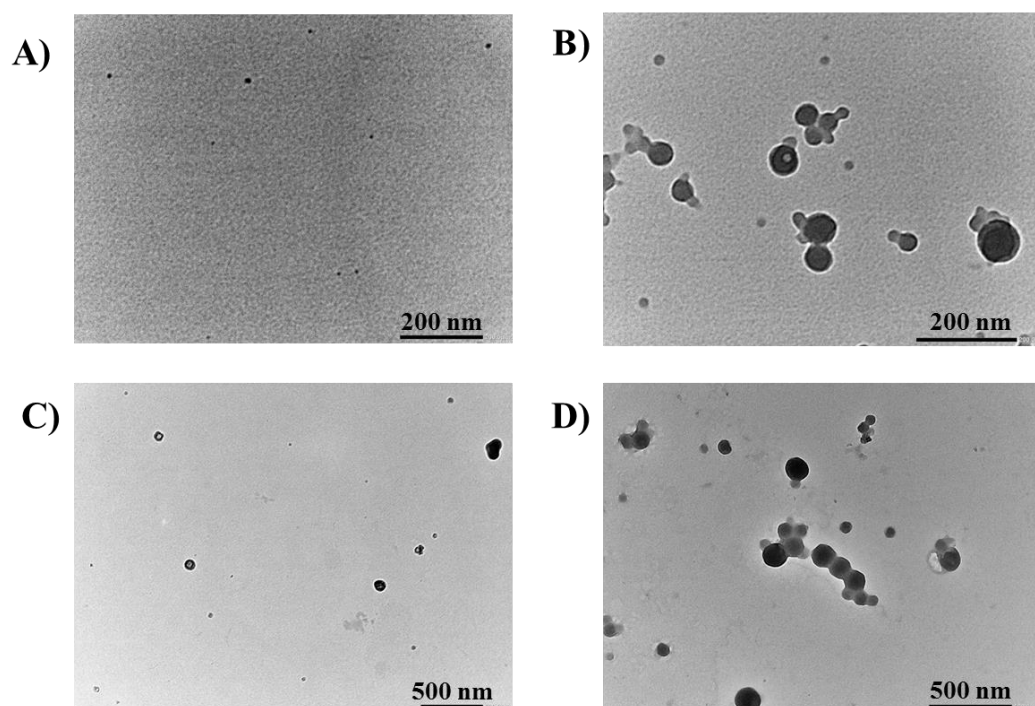

**Fig. S14** TEM image of nanoaggregates of **Ir-1-N<sup>+</sup>** formed in CH<sub>3</sub>CN-water mixtures with A) 0% and B) 99% water fraction. TEM image of nanoaggregates of **Ir-2-N<sup>+</sup>** formed in CH<sub>3</sub>CN-water mixtures with C) 0% and D) 99% water fraction.

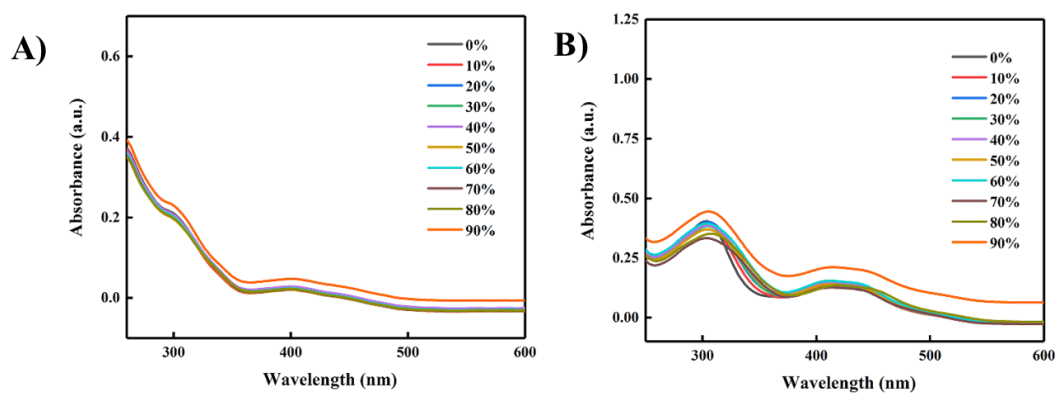

**Fig. S15** Absorption spectra of A) **Ir-1-N<sup>+</sup>** and B) **Ir-2-N<sup>+</sup>** in CH<sub>3</sub>CN-water mixtures (complex concentration =  $1.0 \times 10^{-5}$  M) with different water fractions (0-99%, v/v).

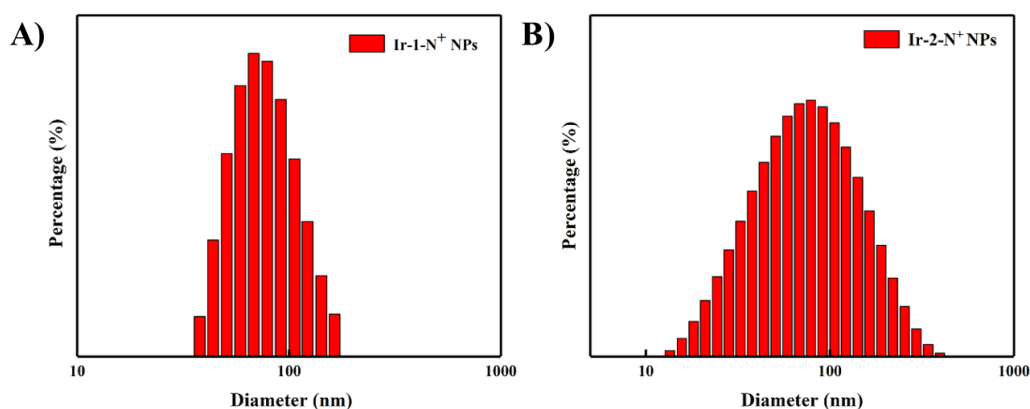

**Fig. S16.** DLS results of A) **Ir-1-N<sup>+</sup>** and B) **Ir-2-N<sup>+</sup>**.

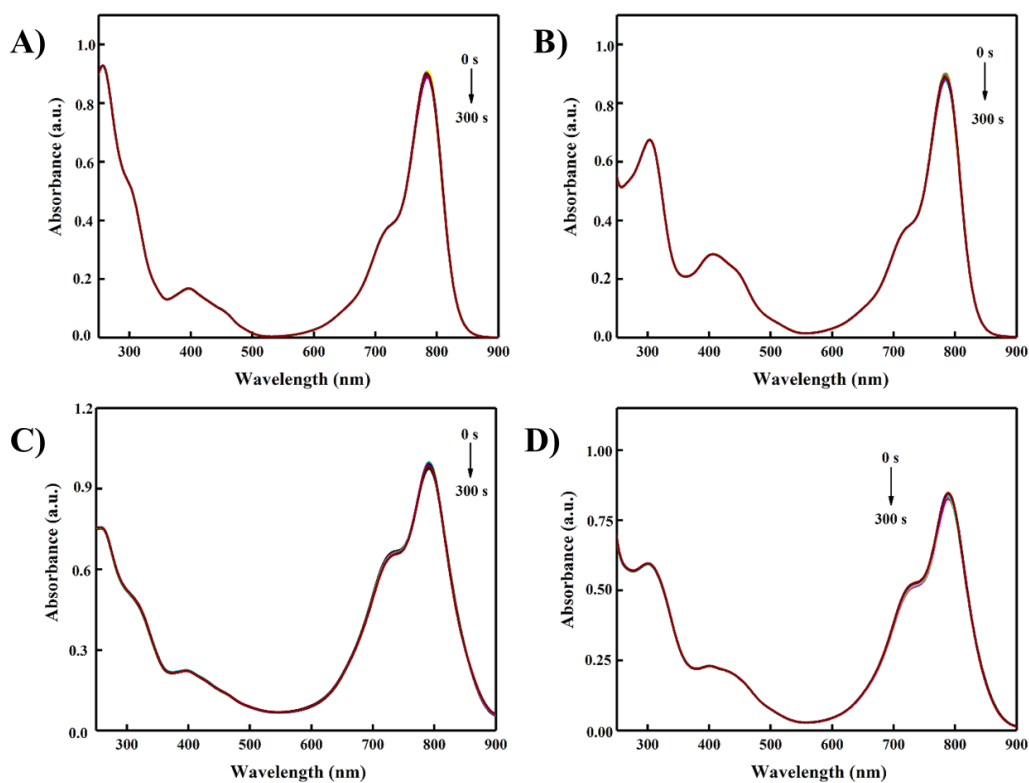

**Fig. S17** UV-vis absorption spectra of ICG ( $5 \mu\text{g mL}^{-1}$ ) in the presence of A) **Ir-1-N<sup>+</sup>**, B) **Ir-2-N<sup>+</sup>**, C) **Ir-1-N<sup>+</sup>** NPs and D) **Ir-2-N<sup>+</sup>** NPs ( $15 \mu\text{g mL}^{-1}$ ) at different times under dark conditions. The time interval of spectral recording = 30 s.

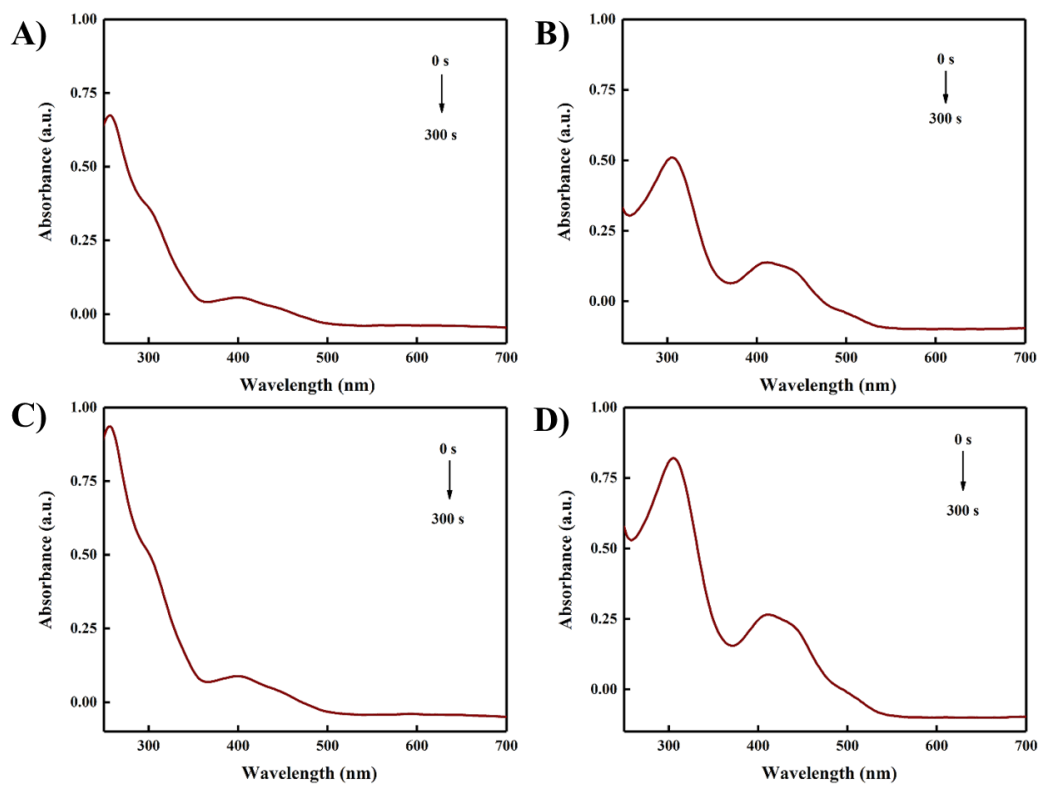

**Fig. S18** UV-vis absorption spectra of A) **Ir-1-N<sup>+</sup>**, B) **Ir-2-N<sup>+</sup>**, C) **Ir-1-N<sup>+</sup> NPs** and D) **Ir-2-N<sup>+</sup> NPs** ( $15 \mu\text{g mL}^{-1}$ ) at different times upon irradiation of a 425 nm LED at  $20 \text{ mW cm}^{-2}$ . The time interval of spectral recording = 30 s.

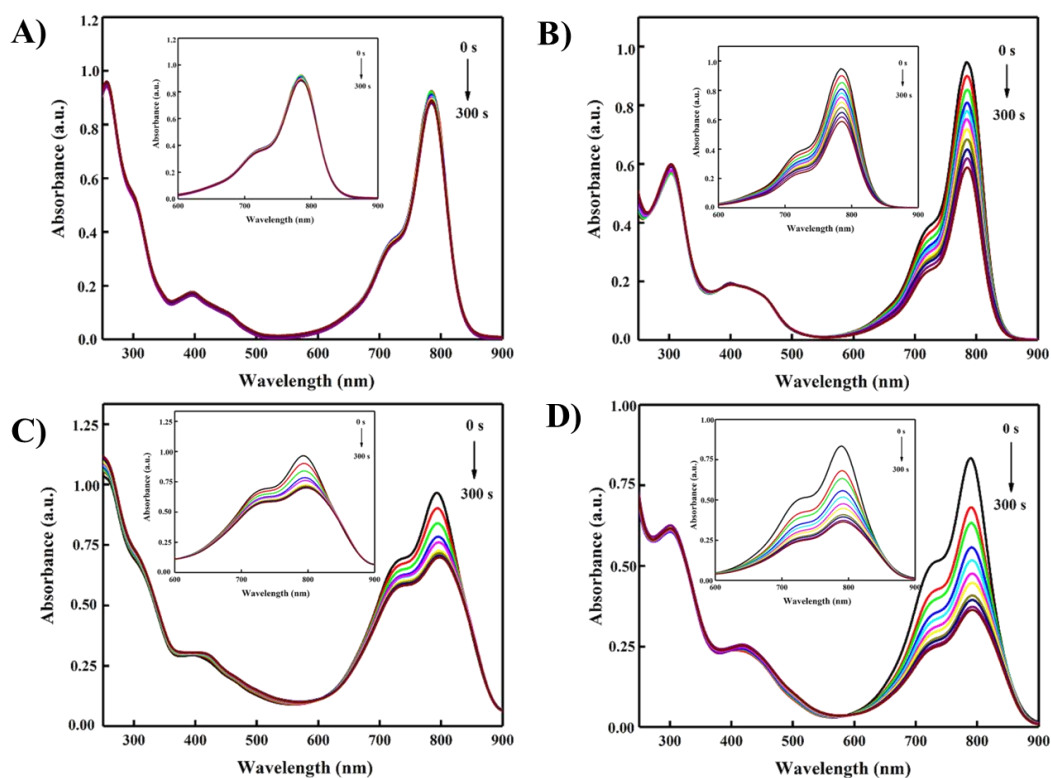

28

**Fig. S19** UV-vis absorption spectra of ICG ( $5 \mu\text{g mL}^{-1}$ ) in the presence of A) **Ir-1-N<sup>+</sup>**, B) **Ir-2-N<sup>+</sup>**, C) **Ir-1-N<sup>+</sup>** NPs and D) **Ir-2-N<sup>+</sup>** NPs ( $15 \mu\text{g mL}^{-1}$ ) at different times upon irradiation with a 425 nm LED at  $20 \text{ mW cm}^{-2}$ . The time interval of spectral recording = 30 s.

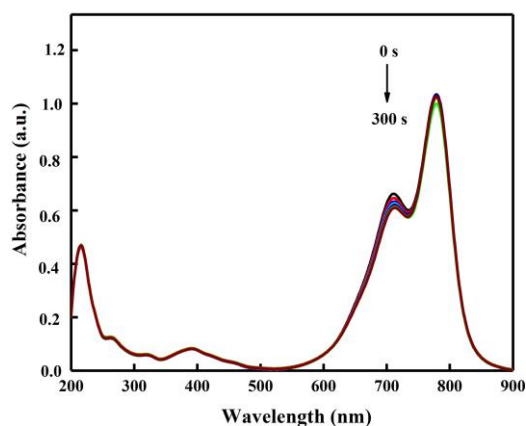

**Fig. S20** UV-vis absorption spectra of ICG ( $5 \mu\text{g mL}^{-1}$ ) upon irradiation with a 425 nm LED at  $20 \text{ mW cm}^{-2}$ . The time interval of spectral recording = 30 s.

**Table S1** Photophysical data of **Ir-1-N<sup>+</sup>** and **Ir-2-N<sup>+</sup>**

|                                          | $\lambda_{\text{abs}}$ (nm) | $\lambda_{\text{em}}$ (nm) | $\Phi_{\text{p}}$ (%) | $\tau_{\text{p}}$ (ns) |
|------------------------------------------|-----------------------------|----------------------------|-----------------------|------------------------|
| <b>Ir-1-N<sup>+</sup></b> <sup>[a]</sup> | 255; 400                    | 640                        | 17                    | 542.2                  |
| <b>Ir-2-N<sup>+</sup></b> <sup>[a]</sup> | 300; 415                    | 660                        | 19                    | 551.3                  |

<sup>[a]</sup> Measured in MeCN/water (v/v = 1/9); concentration:  $1.0 \times 10^{-5}$  M;  $\lambda_{\text{ex}} = 425$  nm

**Table S2** The equation of time-dependent <sup>1</sup>O<sub>2</sub> generation kinetics in Fig. 4f.

| <b>Equation</b>               | <b>y=a+b*x</b>       |                  |                |
|-------------------------------|----------------------|------------------|----------------|
|                               | <b>Adj. R-Square</b> | <b>Intercept</b> | <b>Slope</b>   |
| <b>Ir-1-N<sup>+</sup></b>     | <b>0.99664</b>       | <b>0.01865</b>   | <b>0.00043</b> |
| <b>Ir-2-N<sup>+</sup></b>     | <b>0.99406</b>       | <b>0.04084</b>   | <b>0.00178</b> |
| <b>Ir-1-N<sup>+</sup> NPs</b> | <b>0.98024</b>       | <b>0.04794</b>   | <b>0.00114</b> |
| <b>Ir-2-N<sup>+</sup> NPs</b> | <b>0.98684</b>       | <b>0.1019</b>    | <b>0.00253</b> |

### References for SI

1. Y. Liu, N. Song, L. Chen, S. Liu and Z. Xie, *Chem. Asian J.*, 2018, **13**, 989-995.
2. K. Zhang, L. Q. Lu, Y. Jia, Y. Wang, F. D. Lu, F. Pan and W. J. Xiao, *Angew. Chem. Int. Ed.*, 2019, **58**, 13375-13379.
